# Supplementary material for: Interbacterial competition and anti‐predatory behaviour of environmental Vibrio cholerae strains
Source: PubMed Central journal article supplement (PMC7702109; doi:10.1111/1462-2920.15224), 2020-10-02
Supplement: EMI-22-4485-s001.pdf [file EMI-22-4485-s001.pdf]

# **Supporting Information**

## **Interbacterial competition and anti-predatory behavior of environmental *Vibrio cholerae* strains**

**Natália C. Drebes Dörr and Melanie Blokesch\***

**Supporting tables and legends**

**Table S1.** *Vibrio cholerae*, *Escherichia coli* and *Klebsiella pneumoniae* strains used in this study.

| Strain names                           | Genotype / description                                                                                                                                                                                   | Internal strain number | Reference                            |
|----------------------------------------|----------------------------------------------------------------------------------------------------------------------------------------------------------------------------------------------------------|------------------------|--------------------------------------|
| <b><i>V. cholerae</i></b>              |                                                                                                                                                                                                          |                        |                                      |
| A1552 (WT)                             | Wild-type, O1 El Tor Inaba; Rif <sup>R</sup>                                                                                                                                                             | MB_1                   | (Yildiz and Schoolnik, 1998)         |
| W10G                                   | Environmental isolate (clade A) collected in Waddell Creek (CA, USA) in October 2004                                                                                                                     | MB_5537                | (Keymer <i>et al.</i> , 2007)        |
| SA3G                                   | Environmental isolate (clade B) collected in Old Salinas River (CA, USA) in March 2004                                                                                                                   | MB_957                 | (Keymer <i>et al.</i> , 2007)        |
| SA5Y                                   | Environmental isolate (clade B) collected in Old Salinas River (CA, USA) in May 2004                                                                                                                     | MB_353                 | (Keymer <i>et al.</i> , 2007)        |
| SL4G                                   | Environmental isolate (clade B) collected in San Lorenzo River (CA, USA) in April 2004                                                                                                                   | MB_955                 | (Keymer <i>et al.</i> , 2007)        |
| SL5Y                                   | Environmental isolate (clade B) collected in San Lorenzo River (CA, USA) in May 2004                                                                                                                     | MB_954                 | (Keymer <i>et al.</i> , 2007)        |
| SO5Y                                   | Environmental isolate (clade B) collected in Soquel Creek (CA, USA) in May 2004                                                                                                                          | MB_960                 | (Keymer <i>et al.</i> , 2007)        |
| L6G                                    | Environmental isolate (clade C) collected in Lagunitas Creek (CA, USA) in June 2004                                                                                                                      | MB_956                 | (Keymer <i>et al.</i> , 2007)        |
| SL6Y                                   | Environmental isolate (clade C) collected in San Lorenzo River (CA, USA) in June 2004                                                                                                                    | MB_953                 | (Keymer <i>et al.</i> , 2007)        |
| SP6G                                   | Environmental isolate (clade C) collected in San Pedro Creek (CA, USA) in June 2004                                                                                                                      | MB_964                 | (Keymer <i>et al.</i> , 2007)        |
| SP7G                                   | Environmental isolate (clade C) collected in San Pedro Creek (CA, USA) in July 2004                                                                                                                      | MB_952                 | (Keymer <i>et al.</i> , 2007)        |
| W6G                                    | Environmental isolate (clade C) collected in Waddell Creek (CA, USA) in June 2004                                                                                                                        | MB_354                 | (Keymer <i>et al.</i> , 2007)        |
| W7G                                    | Environmental isolate (clade C) collected in Waddell Creek (CA, USA) in July 2004                                                                                                                        | MB_962                 | (Keymer <i>et al.</i> , 2007)        |
| E7G                                    | Environmental isolate (clade D) collected in Moss Landing Harbor (CA, USA) in July 2004                                                                                                                  | MB_963                 | (Keymer <i>et al.</i> , 2007)        |
| SA7G                                   | Environmental isolate (clade D) collected in Old Salinas River (CA, USA) in July 2004                                                                                                                    | MB_959                 | (Keymer <i>et al.</i> , 2007)        |
| SA10G                                  | Environmental isolate (clade D) collected in Old Salinas River (CA, USA) in October 2004                                                                                                                 | MB_5539                | (Keymer <i>et al.</i> , 2007)        |
| A1552Δ <i>hlyA</i>                     | A1552 with <i>aph</i> cassette in <i>hlyA</i> (A1552VC_A02993; homolog to VCA0219*); Rif <sup>R</sup> , Kan <sup>R</sup>                                                                                 | MB_3934                | This study                           |
| W10GΔ <i>hlyA</i>                      | W10G with <i>aph</i> cassette in <i>hlyA</i> (HPY12_14900); Kan <sup>R</sup>                                                                                                                             | MB_8548                | This study                           |
| SA5YΔ <i>hlyA</i>                      | SA5Y with <i>aph</i> cassette in <i>hlyA</i> (VC-Sa5Y_02920); Kan <sup>R</sup>                                                                                                                           | MB_4622                | This study                           |
| SL6YΔ <i>hlyA</i>                      | SL6Y with <i>cat</i> cassette in <i>hlyA</i> (HPY06_14140); Cm <sup>R</sup>                                                                                                                              | MB_8549                | This study                           |
| SA10GΔ <i>hlyA</i>                     | SA10G with <i>aph</i> cassette in <i>hlyA</i> (HPY11_14585); Kan <sup>R</sup>                                                                                                                            | MB_8550                | This study                           |
| A1552Δ <i>vipA</i>                     | A1552 with <i>aph</i> cassette in <i>vipA</i> (A1552VC_A02892; homolog to VCA0107); Rif <sup>R</sup> , Kan <sup>R</sup>                                                                                  | MB_3012                | This study                           |
| W10GΔ <i>vipA</i>                      | W10G with <i>aph</i> cassette in <i>vipA</i> (HPY12_14395); Kan <sup>R</sup>                                                                                                                             | MB_6850                | This study                           |
| SA5YΔ <i>vipA</i>                      | SA5Y with <i>aph</i> cassette in <i>vipA</i> (VC-Sa5Y_02822); Kan <sup>R</sup>                                                                                                                           | MB_5772                | This study                           |
| L6GΔ <i>vipA</i>                       | L6G with <i>aph</i> cassette in <i>vipA</i> (HPY16_13230); Kan <sup>R</sup>                                                                                                                              | MB_8628                | This study                           |
| SL6YΔ <i>vipA</i>                      | SL6Y with <i>aph</i> cassette in <i>vipA</i> (HPY06_13635); Kan <sup>R</sup>                                                                                                                             | MB_8551                | This study                           |
| SP7GΔ <i>vipA</i>                      | SP7G with <i>aph</i> cassette in <i>vipA</i> (HPY08_13415); Kan <sup>R</sup>                                                                                                                             | MB_8629                | This study                           |
| SP7GΔ <i>vipA</i> -Rif <sup>R</sup>    | SP7G with <i>aph</i> cassette in <i>vipA</i> (HPY08_13415); transformed with PCR of <i>rpoB</i> gene containing mutation (S531F) that confers rifampicin resistance; Kan <sup>R</sup> , Rif <sup>R</sup> | MB_8630                | This study                           |
| SA10GΔ <i>vipA</i>                     | SA10G with <i>aph</i> cassette in <i>vipA</i> gene (HPY11_14100); Kan <sup>R</sup>                                                                                                                       | MB_8552                | This study                           |
| A1552-Rif <sup>S</sup>                 | A1552 sensitive to Rifampicin (please check Material and Methods for details on construction)                                                                                                            | MB_5161                | This study                           |
| A1552Δ <i>lacZ</i> ::FRT-Kan-pheS*-FRT | A1552 with construct Δ <i>lacZ</i> ::FRT-Kan-pheS*-FRT; Rif <sup>R</sup> , cPhe <sup>S</sup>                                                                                                             | MB_4609                | (Van der Henst <i>et al.</i> , 2018) |
| A1552-Rif <sup>S</sup> Δ <i>vipA</i>   | A1552-Rif <sup>S</sup> with <i>aph</i> cassette in <i>vipA</i> ; Rif <sup>R</sup> , Kan <sup>R</sup>                                                                                                     | MB_8553                | This study                           |

|                                                |                                                                                                                                                                                                                                                    |         |                                    |
|------------------------------------------------|----------------------------------------------------------------------------------------------------------------------------------------------------------------------------------------------------------------------------------------------------|---------|------------------------------------|
| SL6Y-vgrG1ΔACD                                 | SL6Y with truncated <i>vgrG1</i> through insertion of a stop codon and insertion of an <i>aph</i> cassette that replaces the ACD-encoding sequence; Kan <sup>R</sup>                                                                               | MB_8557 | This study                         |
| SA10G-vgrG1ΔACD                                | SA10G with truncated <i>vgrG1</i> through insertion of a stop codon and insertion of an <i>aph</i> cassette that replaces the ACD-encoding sequence; Kan <sup>R</sup>                                                                              | MB_8558 | This study                         |
| ATCC25872                                      | <i>V. cholerae</i> non-O1 strain (O37); isolated in 1965, Czechoslovakia; intermediate resistant to Strep                                                                                                                                          | MB_276  | Aldová <i>et al.</i> , 1968        |
| ATCC25872Δ <i>vipA</i>                         | ATCC25872 deleted for <i>vipA</i> (TransFLP); intermediate resistant to Strep                                                                                                                                                                      | MB_5065 | Van der Henst <i>et al.</i> , 2018 |
| ATCC25872 - vgrG1ΔACD                          | ATCC25872 with truncated <i>vgrG1</i> through insertion of a stop codon and insertion of an <i>aph</i> cassette that replaces the ACD-encoding sequence; Kan <sup>R</sup> , intermediate resistant to Strep                                        | MB_8559 | This study                         |
| W10G-Rif <sup>R</sup>                          | W10G selected for rifampicin resistance                                                                                                                                                                                                            | MB_8562 | This study                         |
| SA3G-Rif <sup>R</sup>                          | SA3G transformed with PCR of <i>rpoB</i> gene containing mutation (S531F) that confers rifampicin resistance                                                                                                                                       | MB_8563 | This study                         |
| SA5Y-Rif <sup>R</sup>                          | SA5Y selected for rifampicin resistance                                                                                                                                                                                                            | MB_8564 | This study                         |
| SL4G-Rif <sup>R</sup>                          | SL4G selected for rifampicin resistance                                                                                                                                                                                                            | MB_8565 | This study                         |
| SL5Y-Rif <sup>R</sup>                          | SL5Y selected for rifampicin resistance                                                                                                                                                                                                            | MB_8566 | This study                         |
| SO5Y-Rif <sup>R</sup>                          | SO5Y selected for rifampicin resistance                                                                                                                                                                                                            | MB_8567 | This study                         |
| L6G-Rif <sup>R</sup>                           | L6G transformed with PCR of <i>rpoB</i> gene containing mutation (S531F) that confers rifampicin resistance                                                                                                                                        | MB_8568 | This study                         |
| SL6Y-Rif <sup>R</sup>                          | SL6Y selected for rifampicin resistance                                                                                                                                                                                                            | MB_8569 | This study                         |
| SP6G-Rif <sup>R</sup>                          | SP6G selected for rifampicin resistance                                                                                                                                                                                                            | MB_8570 | This study                         |
| SP7G-Rif <sup>R</sup>                          | SP7G transformed with PCR of <i>rpoB</i> gene containing mutation (S531F) that confers rifampicin resistance                                                                                                                                       | MB_8571 | This study                         |
| W6G-Rif <sup>R</sup>                           | W6G selected for rifampicin resistance                                                                                                                                                                                                             | MB_8572 | This study                         |
| W7G-Rif <sup>R</sup>                           | W7G selected for rifampicin resistance                                                                                                                                                                                                             | MB_8573 | This study                         |
| E7G-Rif <sup>R</sup>                           | E7G selected for rifampicin resistance                                                                                                                                                                                                             | MB_8574 | This study                         |
| SA7G-Rif <sup>R</sup>                          | SA7G selected for rifampicin resistance                                                                                                                                                                                                            | MB_8575 | This study                         |
| SA10G-Rif <sup>R</sup>                         | SA10G selected for rifampicin resistance                                                                                                                                                                                                           | MB_8576 | This study                         |
| SP7GΔ <i>Aux6</i>                              | SP7G with <i>aph</i> cassette in the end of T6SS <i>Aux6</i> (HPY08_16370-16380); Kan <sup>R</sup>                                                                                                                                                 | MB_8631 | This study                         |
| SP7GΔ <i>Aux6</i> -Rif <sup>R</sup>            | SP7G with <i>aph</i> cassette in the end of T6SS <i>Aux6</i> (HPY08_16370-16380); Kan <sup>R</sup> ; Rif <sup>R</sup>                                                                                                                              | MB_8632 | This study                         |
| <b><i>E. coli</i> and <i>K. pneumoniae</i></b> |                                                                                                                                                                                                                                                    |         |                                    |
| TOP 10                                         | F- <i>mcrA</i> Δ( <i>mrr</i> - <i>hsdRMS</i> - <i>mcrBC</i> ) φ80 <i>lacZ</i> Δ <i>M15</i> Δ <i>lacX74</i> <i>nupG</i> <i>recA1</i> <i>araD139</i> Δ( <i>ara-leu</i> )7697 <i>galE15</i> <i>galK16</i> <i>rpsL</i> ( <i>StrR</i> ) <i>endA1</i> λ- | MB_741  | This study                         |
| <i>K. pneumoniae</i>                           | <i>Klebsiella</i> sp. / pANT5 (GFP)                                                                                                                                                                                                                | MB_6380 | (Benghezal <i>et al.</i> , 2006)   |

\*reference locus tags belong to reference strain N16961 according to Heidelberg *et al.*, 2000.

**Table S2.** Information on long-read whole genome sequencing data and assemblies of NCBI BioProject PRJNA633476.

| Strain name  | Strain ID | BioSample    | GenBank accession numbers                                | Number of bases  | Number of reads | Mean read length | Total number of contigs | Contig length after circularization                             | Total genome size | Mean coverage | GC% content                                  |
|--------------|-----------|--------------|----------------------------------------------------------|------------------|-----------------|------------------|-------------------------|-----------------------------------------------------------------|-------------------|---------------|----------------------------------------------|
| <b>W10G</b>  | MB#5537   | SAMN14944057 | CP053794 (chr1)<br>CP053795 (chr2)                       | 2,050,336,308 bp | 119,162         | 17,206 bp        | 2 (chr1+chr2)           | 3,033,188 bp (chr1)<br>1,028,867 bp (chr2)                      | 4,062,055 bp      | 292 x         | 47.7% (chr1)<br>47.2% (chr2)                 |
| <b>SA3G</b>  | MB#957    | SAMN14944058 | CP053744 (chr1)<br>CP053745 (chr2)                       | 1,239,715,817 bp | 70,375          | 17,615 bp        | 2 (chr1+chr2)           | 3,020,084 bp (chr1)<br>1,159,698 bp (chr2)                      | 4,179,782 bp      | 201 x         | 47.6% (chr1)<br>47.0% (chr2)                 |
| <b>SA5Y#</b> | MB#353    | SAMN08813238 | CP028892 (chr1)<br>CP028893 (chr2)                       | 635,540,812 bp   | 35,390          | 17,958 bp        | 2 (chr1+chr2)           | 2,955,400 bp (chr1)<br>1,095,478 bp (chr2)                      | 4,050,878 bp      | 133 x         | 47.8% (chr1)<br>46.8% (chr2)                 |
| <b>SL4G</b>  | MB#955    | SAMN14944065 | CP053796 (chr1)<br>CP053797 (chr2)                       | 1,083,962,388 bp | 55,665          | 19,472 bp        | 2 (chr1+chr2)           | 2,954,462 bp (chr1)<br>1,173,143 bp (chr2)                      | 4,127,605 bp      | 186 x         | 47.8% (chr1)<br>46.4% (chr2)                 |
| <b>SL5Y</b>  | MB#954    | SAMN14944067 | CP053798 (chr1)<br>CP053799 (chr2)                       | 1,623,840,987 bp | 84,121          | 19,303 bp        | 2 (chr1+chr2)           | 2,947,299 bp (chr1)<br>1,086,276 bp (chr2)                      | 4,033,575 bp      | 336 x         | 47.8% (chr1)<br>46.9% (chr2)                 |
| <b>SO5Y</b>  | MB#960    | SAMN14944069 | CP053800 (chr1)<br>CP053801 (chr2)                       | 865,600,319 bp   | 47,657          | 18,163 bp        | 2 (chr1+chr2)           | 2,947,270 bp (chr1)<br>1,049,609 bp (chr2)                      | 3,996,879 bp      | 245 x         | 47.9% (chr1)<br>47.0% (chr2)                 |
| <b>L6G</b>   | MB#956    | SAMN14944070 | CP053802 (chr1)<br>CP053803 (chr2)                       | 1,134,851,816 bp | 70,295          | 16,144 bp        | 2 (chr1+chr2)           | 2,829,740 bp (chr1)<br>1,195,206 bp (chr2)                      | 4,024,946 bp      | 225 x         | 48.1% (chr1)<br>46.3% (chr2)                 |
| <b>SL6Y</b>  | MB#953    | SAMN14944072 | CP053804 (chr1)<br>CP053805 (chr2)                       | 826,125,289 bp   | 48,156          | 17,155 bp        | 2 (chr1+chr2)           | 2,900,064 bp (chr1)<br>1,143,503 bp (chr2)                      | 4,043,567 bp      | 175 x         | 47.8% (chr1)<br>46.7% (chr2)                 |
| <b>SP6G</b>  | MB#964    | SAMN14944080 | CP053806 (chr1)<br>CP053807 (chr2)                       | 874,659,808 bp   | 47,923          | 18,251 bp        | 2 (chr1+chr2)           | 2,947,818 bp (chr1)<br>1,229,641 bp (chr2)                      | 4,177,459 bp      | 154 x         | 47.8% (chr1)<br>46.7% (chr2)                 |
| <b>SP7G</b>  | MB#952    | SAMN14944081 | CP053808 (chr1)<br>CP053809 (chr2)                       | 1,339,636,117 bp | 73,934          | 18,119 bp        | 3 (chr1+chr2)           | 2,868,038 bp (chr1)<br>1,217,051 bp (chr2)                      | 4,085,089 bp      | 217 x         | 48.0% (chr1)<br>46.5% (chr2)                 |
| <b>W6G</b>   | MB#354    | SAMN14944082 | CP053810 (chr1)<br>CP053811 (chr2)<br>CP053812 (plasmid) | 1,247,754,152 bp | 69,891          | 17,852 bp        | 3 (chr1+chr2+plasmid)   | 2,967,360 bp (chr1)<br>1,202,132 bp (chr2)<br>306,484 bp (plas) | 4,475,976 bp      | 192 x         | 47.8% (chr1)<br>46.6% (chr2)<br>42.2% (plas) |
| <b>W7G</b>   | MB#962    | SAMN14944083 | CP053813 (chr1)                                          | 1,490,677,399 bp | 86,303          | 17,272 bp        | 3 (chr1+chr2+plasmid)   | 2,967,793 bp (chr1)<br>1,202,155 bp (chr2)<br>306,481 bp (plas) | 4,476,429 bp      | 223 x         | 47.8% (chr1)<br>46.6% (chr2)<br>42.2% (plas) |

|              |         |              |                                                                                                |                     |        |           |                                    |                                                                                      |                 |       |                                                                |
|--------------|---------|--------------|------------------------------------------------------------------------------------------------|---------------------|--------|-----------|------------------------------------|--------------------------------------------------------------------------------------|-----------------|-------|----------------------------------------------------------------|
|              |         |              | CP053814<br>(chr2)<br>CP053815<br>(plasmid)                                                    |                     |        |           |                                    |                                                                                      |                 |       |                                                                |
| <b>E7G</b>   | MB#963  | SAMN14944111 | CP053822<br>(chr1)<br>CP053823<br>(chr2)<br>CP053824<br>(plasmid)                              | 1,477,482,932<br>bp | 83,856 | 17,619 bp | 3<br>(chr1+chr2+<br>plasmid)       | 3,040,343 bp (chr1)<br>1,199,805 bp (chr2)<br>80,726 bp (plas)                       | 4,320,874<br>bp | 194 x | 47.8% (chr1)<br>46.5% (chr2)<br>46.3% (plas)                   |
| <b>SA7G</b>  | MB#959  | SAMN14944112 | CP053816<br>(chr1)<br>CP053817<br>(chr2)<br>CP053818<br>(plasmid 1)<br>CP053819<br>(plasmid 2) | 1,689,606,494<br>bp | 98,160 | 17,212 bp | 4<br>(chr1+chr2+<br>plasmid 1 + 2) | 3,004,584 bp (chr1)<br>1,182,929 bp (chr2)<br>79,397 bp (plas1)<br>80,721 bp (plas2) | 4,347,631<br>bp | 245 x | 47.8% (chr1)<br>46.5% (chr2)<br>42.2% (plas1)<br>46.3% (plas2) |
| <b>SA10G</b> | MB#5539 | SAMN14944113 | CP053820<br>(chr1)<br>CP053821<br>(chr2)                                                       | 1,643,277,942<br>bp | 91,387 | 17,981 bp | 2 (chr1+chr2)                      | 3,010,605 bp (chr1)<br>1,166,701 bp (chr2)                                           | 4,177,306<br>bp | 269 x | 47.8% (chr1)<br>46.6% (chr2)                                   |

#Data based on Matthey *et al.*, 2018

**Table S3.** BlastP-predicted T6SS effector and immunity proteins<sup>1</sup> of pandemic, non-pandemic toxigenic, and environmental *V. cholerae* strains.

| Clade           | Strain name   | Major cluster E/I                                                                                                                   | Aux cluster 1<br><i>vgrG1</i>                                                        | Aux cluster 1 E/I                                                                           | Aux cluster 2 E/I                                                                                                                       | Aux cluster 3 E/I                                                                  |
|-----------------|---------------|-------------------------------------------------------------------------------------------------------------------------------------|--------------------------------------------------------------------------------------|---------------------------------------------------------------------------------------------|-----------------------------------------------------------------------------------------------------------------------------------------|------------------------------------------------------------------------------------|
| <b>Pandemic</b> | <b>A1552</b>  | Encoded protein with 1018 aa; evolved VgrG3 with predicted peptidoglycan hydrolase domain; A-type.                                  | Encoded protein with 1164 aa; evolved VgrG1 with an actin crosslinking domain (ACD). | Encoded protein with 642 aa; lipase class 3; A-type.                                        | Encoded protein with 1086 aa; VasX; pore forming activity <sup>2</sup> ; A-type.                                                        | Encoded protein with 224 aa; papain-like NlpC/P60 peptidase <sup>3</sup> ; A-type. |
| <b>D</b>        | <b>SA10G*</b> | Encoded protein with 995 aa; evolved VgrG3 with predicted peptidoglycan hydrolase and pesticin-like lysozyme domains; J-type.       | Encoded protein with 1164 aa; evolved VgrG1 with an actin crosslinking domain (ACD). | Encoded protein with 710 aa; uncharacterized alpha/beta hydrolase domain (DUF2235); C-type. | Encoded protein with 1194 aa; predicted lysin motif (binds peptidoglycan), but also with pore formation activity <sup>4</sup> ; E-type. | Aux cluster 3 is absent.                                                           |
|                 | <b>E7G*</b>   | Encoded protein with 995 aa; evolved VgrG3 with predicted peptidoglycan hydrolase and pesticin-like lysozyme domains; J-type.       | Encoded protein with 1164 aa; evolved VgrG1 with an actin crosslinking domain (ACD). | Encoded protein with 710 aa; uncharacterized alpha/beta hydrolase domain (DUF2235); C-type. | Encoded protein with 1197 aa; predicted lysin motif (binds peptidoglycan), but also with pore formation activity <sup>4</sup> ; E-type. | Aux cluster 3 is absent.                                                           |
|                 | <b>SA7G*</b>  | Encoded protein with 995 aa; evolved VgrG3 with predicted peptidoglycan hydrolase and pesticin-like lysozyme domains; J-type.       | Encoded protein with 1164 aa; evolved VgrG1 with an actin crosslinking domain (ACD). | Encoded protein with 710 aa; uncharacterized alpha/beta hydrolase domain (DUF2235); C-type. | Encoded protein with 1197 aa; predicted lysin motif (binds peptidoglycan), but also with pore formation activity <sup>4</sup> ; E-type. | Aux cluster 3 is absent.                                                           |
| <b>C</b>        | <b>SL6Y</b>   | Encoded protein with 977 aa; evolved VgrG3 with a predicted peptidoglycan hydrolase and phage-like lysozyme domains. E-type.        | Encoded protein with 1164 aa; evolved VgrG1 with an actin crosslinking domain (ACD). | Encoded protein with 710 aa; uncharacterized alpha/beta hydrolase domain (DUF2235); C-type. | Encoded protein with 1086 aa; 98.3% identical to A1552's VasX; pore forming activity <sup>2</sup> ; A-type.                             | Aux cluster 3 is absent.                                                           |
|                 | <b>SP6G*</b>  | Encoded protein with 1052 aa; evolved VgrG3 with a predicted peptidoglycan hydrolase domain; H-type.                                | Encoded protein with 1164 aa; evolved VgrG1 with an actin crosslinking domain (ACD). | Encoded protein with 710 aa; uncharacterized alpha/beta hydrolase domain (DUF2235); C-type. | Encoded protein with 1087 aa; 94.8% identical to A1552's VasX; pore forming activity <sup>2</sup> ; A-type.                             | Aux cluster 3 is absent.                                                           |
|                 | <b>L6G*</b>   | Encoded protein with 989 aa; evolved VgrG3 with a predicted peptidoglycan hydrolase and lambda phage-like lysozyme domains; K-type. | Encoded protein with 1167 aa; evolved VgrG1 with an actin crosslinking domain (ACD). | Encoded protein with 710 aa; uncharacterized alpha/beta hydrolase domain (DUF2235); C-type. | Encoded protein with 1194 aa; predicted lysin motif (binds peptidoglycan), but also with pore formation activity <sup>4</sup> ; E-type. | Aux cluster 3 is absent.                                                           |
|                 | <b>W6G*</b>   | Encoded protein with 1052 aa; evolved VgrG3 with a predicted peptidoglycan hydrolase domain; H-type.                                | Encoded protein with 1164 aa; evolved VgrG1 with an actin crosslinking domain (ACD). | Encoded protein with 710 aa; uncharacterized alpha/beta hydrolase domain (DUF2235); C-type. | Encoded protein with 1088 aa; 94.1% identical to A1552's VasX; pore forming activity <sup>2</sup> ; A-type.                             | Aux cluster 3 is absent.                                                           |
|                 | <b>W7G*</b>   | Encoded protein with 1052 aa; evolved VgrG3 with a predicted peptidoglycan hydrolase domain; H-type.                                | Encoded protein with 1164 aa; evolved VgrG1 with an actin crosslinking domain (ACD). | Encoded protein with 710 aa; uncharacterized alpha/beta hydrolase domain (DUF2235); C-type. | Encoded protein with 1088 aa; 94.1% identical to A1552's VasX; pore forming activity <sup>2</sup> ; A-type.                             | Aux cluster 3 is absent.                                                           |

|                     |                  |                                                                                                                                         |                                                                                      |                                                                                                                                                                                                                                                   |                                                                                                                                                                                                                                        |                                                                                    |
|---------------------|------------------|-----------------------------------------------------------------------------------------------------------------------------------------|--------------------------------------------------------------------------------------|---------------------------------------------------------------------------------------------------------------------------------------------------------------------------------------------------------------------------------------------------|----------------------------------------------------------------------------------------------------------------------------------------------------------------------------------------------------------------------------------------|------------------------------------------------------------------------------------|
|                     | <b>SP7G**</b>    | Encoded protein with 439 aa, independent from VgrG3 (structural only); cell adhesion function <sup>4</sup> ; B-type.                    | Encoded protein with 1164 aa; evolved VgrG1 with an actin crosslinking domain (ACD). | Encoded protein with 710 aa; uncharacterized alpha/beta hydrolase domain (DUF2235); C-type.                                                                                                                                                       | Encoded protein with 1194 aa; predicted lysin motif (binds peptidoglycan), but also with pore formation activity <sup>4</sup> ; E-type.                                                                                                | Aux cluster 3 is absent.                                                           |
| <b>A</b>            | <b>W10G</b>      | Encoded protein with 1018 aa; evolved VgrG3 with predicted peptidoglycan hydrolase domain; A-type.                                      | Encoded protein with 684 aa; structural VgrG1 protein.                               | PacBio sequencing artifact in the effector gene (HPY12_07370). Region was Sanger sequenced and manually corrected before translation to allow typing. Encoded protein with 710 aa; uncharacterized alpha/beta hydrolase domain (DUF2235); C-type. | PacBio sequencing artifact in the effector gene (HPY12_14010). Region was Sanger sequenced and manually corrected before translation to allow typing. Encoded protein with 1086 aa; VasX; pore forming activity <sup>2</sup> ; A-type. | Aux cluster 3 is absent.                                                           |
| <b>B</b>            | <b>SA3G</b>      | Encoded protein with 1018 aa; evolved VgrG3 with predicted peptidoglycan hydrolase domain; A-type.                                      | Encoded protein with 684 aa; structural VgrG1 protein.                               | Encoded protein with 710 aa; uncharacterized alpha/beta hydrolase domain (DUF2235); C-type.                                                                                                                                                       | Encoded protein with 1087 aa; 94.3% identical to A1552's VasX; pore forming activity <sup>2</sup> ; A-type.                                                                                                                            | Aux cluster 3 is absent.                                                           |
|                     | <b>SA5Y</b>      | Encoded protein with 995 aa; evolved VgrG3 with predicted peptidoglycan hydrolase and pesticin-like lysozyme domains; J-type.           | Encoded protein with 684 aa; structural VgrG1 protein.                               | Encoded protein with 710 aa; uncharacterized alpha/beta hydrolase domain (DUF2235); C-type.                                                                                                                                                       | Encoded protein with 1088 aa; 93.7% identical to A1552's VasX; pore forming activity <sup>2</sup> ; A-type.                                                                                                                            | Aux cluster 3 is absent.                                                           |
|                     | <b>SL4G*</b>     | Encoded protein with 995 aa; evolved VgrG3 with predicted peptidoglycan hydrolase and pesticin-like lysozyme domains; J-type.           | Encoded protein with 684 aa; structural VgrG1 protein.                               | Encoded protein with 710 aa; uncharacterized alpha/beta hydrolase domain (DUF2235); C-type.                                                                                                                                                       | Encoded protein with 1088 aa; 93.7% identical to A1552's VasX; pore forming activity <sup>2</sup> ; A-type.                                                                                                                            | Aux cluster 3 is absent.                                                           |
|                     | <b>SL5Y*</b>     | Encoded protein with 995 aa; evolved VgrG3 with predicted peptidoglycan hydrolase and pesticin-like lysozyme domains; J-type.           | Encoded protein with 684 aa; structural VgrG1 protein.                               | Encoded protein with 710 aa; uncharacterized alpha/beta hydrolase domain (DUF2235); C-type.                                                                                                                                                       | Encoded protein with 1088 aa; 93.7% identical to A1552's VasX; pore forming activity <sup>2</sup> ; A-type.                                                                                                                            | Aux cluster 3 is absent.                                                           |
|                     | <b>SO5Y*</b>     | Encoded protein with 1022 aa; evolved VgrG3 with predicted peptidoglycan hydrolase and muramidase (N-acetylmuramidase) domains; I-type. | Encoded protein with 684 aa; structural VgrG1 protein.                               | Encoded protein with 710 aa; uncharacterized alpha/beta hydrolase domain (DUF2235); C-type.                                                                                                                                                       | Encoded protein with 1220 aa; predicted lysin motif (binds peptidoglycan); D-type.                                                                                                                                                     | Aux cluster 3 is absent.                                                           |
| <b>Non-pandemic</b> | <b>ATCC25872</b> | Encoded protein with 1018 aa; evolved VgrG3 with predicted peptidoglycan hydrolase domain; A-type.                                      | Encoded protein with 1164 aa; evolved VgrG1 with an actin crosslinking domain (ACD). | Encoded protein with 642 aa; lipase class 3; A-type.                                                                                                                                                                                              | Encoded protein with 1086 aa; VasX; pore forming activity <sup>2</sup> ; A-type.                                                                                                                                                       | Encoded protein with 224 aa; papain-like NlpC/P60 peptidase <sup>3</sup> ; A-type. |

<sup>1</sup> Typing according to Unterweger *et al.*, 2014 & Kirchberger *et al.*, 2017.

<sup>2</sup> According to Miyata *et al.*, 2011.

<sup>3</sup> According to Hersch *et al.*, 2020.

<sup>4</sup> According to Unterweger *et al.*, 2014.

\* In PGAP annotation, *vgrG3* gene was annotated without the effector portion. Prokka annotation used instead for this study.

\*\* Strain SP7G (clade C) contains an additional T6SS cluster, called Aux 6, which has the same gene order as auxiliary clusters 1 and 2 (see Fig. 4).

**Table S4.** Matrices of % identity (percentage of residues which are identical) among VgrG1-ACD proteins in T6SS auxiliary cluster 1 from clade C and D environmental *V. cholerae* strains and pandemic strain A1552.

| VgrG1-ACD full protein sequence |       |       |      |      |      |      |      |      |      |      |
|---------------------------------|-------|-------|------|------|------|------|------|------|------|------|
|                                 | A1552 | SA10G | E7G  | SA7G | SL6Y | SP6G | L6G  | W7G  | W6G  | SP7G |
| A1552                           |       | 98.2  | 98.2 | 98.2 | 98.6 | 98.8 | 97.3 | 98.5 | 98.5 | 98.4 |
| SA10G                           |       |       | 100  | 100  | 98.9 | 98.9 | 97.2 | 99.1 | 99.1 | 98.9 |
| E7G                             |       |       |      | 100  | 98.9 | 98.9 | 97.2 | 99.1 | 99.1 | 98.9 |
| SA7G                            |       |       |      |      | 98.9 | 98.9 | 97.2 | 99.1 | 99.1 | 98.9 |
| SL6Y                            |       |       |      |      |      | 98.9 | 97.4 | 98.9 | 98.9 | 98.9 |
| SP6G                            |       |       |      |      |      |      | 97.4 | 99.1 | 99.1 | 99.1 |
| L6G                             |       |       |      |      |      |      |      | 97.7 | 97.7 | 97.4 |
| W7G                             |       |       |      |      |      |      |      |      | 100  | 99.4 |
| W6G                             |       |       |      |      |      |      |      |      |      | 99.4 |
| SP7G                            |       |       |      |      |      |      |      |      |      |      |

| Actin cross-linking domain (ACD) protein sequence only |       |       |      |      |      |      |      |      |      |      |
|--------------------------------------------------------|-------|-------|------|------|------|------|------|------|------|------|
|                                                        | A1552 | SA10G | E7G  | SA7G | SL6Y | SP6G | L6G  | W7G  | W6G  | SP7G |
| A1552                                                  |       | 99.6  | 99.6 | 99.6 | 99.6 | 99.6 | 99.6 | 99.6 | 99.6 | 99.4 |
| SA10G                                                  |       |       | 100  | 100  | 100  | 99.6 | 100  | 100  | 100  | 99.8 |
| E7G                                                    |       |       |      | 100  | 100  | 99.6 | 100  | 100  | 100  | 99.8 |
| SA7G                                                   |       |       |      |      | 100  | 99.6 | 100  | 100  | 100  | 99.8 |
| SL6Y                                                   |       |       |      |      |      | 99.6 | 100  | 100  | 100  | 99.8 |
| SP6G                                                   |       |       |      |      |      |      | 99.6 | 99.6 | 99.6 | 99.4 |
| L6G                                                    |       |       |      |      |      |      |      | 100  | 100  | 99.8 |
| W7G                                                    |       |       |      |      |      |      |      |      | 100  | 99.8 |
| W6G                                                    |       |       |      |      |      |      |      |      |      | 99.8 |
| SP7G                                                   |       |       |      |      |      |      |      |      |      |      |

Green: 100% identity  
 Yellow: 90% - 99.99% identity



**Table S5.** Matrices of % identity (percentage of residues which are identical) among effector and immunity proteins harbored in the T6SS large cluster from environmental *V. cholerae* strains and pandemic strain A1552.

| Large cluster – Effector |       |       |     |      |      |      |      |     |     |      |      |      |      |      |      |      |
|--------------------------|-------|-------|-----|------|------|------|------|-----|-----|------|------|------|------|------|------|------|
|                          | A1552 | SA10G | E7G | SA7G | SL6Y | SP6G | L6G  | W7G | W6G | SP7G | W10G | SA3G | SA5Y | SL4G | SL5Y | SO5Y |
| A1552                    |       | 8.9   | 8.9 | 8.9  | 7.5  | 6.7  | 5.7  | 6.7 | 6.7 | 5.3  | 100  | 99.5 | 8.9  | 8.8  | 8.9  | 9.8  |
| SA10G                    |       |       | 100 | 100  | 13.9 | 8.4  | 8.2  | 8.4 | 8.4 | 7.4  | 8.9  | 8.9  | 98.9 | 98.9 | 98.9 | 10.4 |
| E7G                      |       |       |     | 100  | 13.9 | 8.4  | 8.2  | 8.4 | 8.4 | 7.4  | 8.9  | 8.9  | 98.9 | 98.9 | 98.9 | 10.4 |
| SA7G                     |       |       |     |      | 13.9 | 8.4  | 8.2  | 8.4 | 8.4 | 7.4  | 8.9  | 8.9  | 98.9 | 98.9 | 98.9 | 10.4 |
| SL6Y                     |       |       |     |      |      | 8.6  | 10.6 | 8.6 | 8.6 | 5.6  | 7.5  | 7.5  | 13.8 | 13.8 | 13.8 | 6.5  |
| SP6G                     |       |       |     |      |      |      | 9.2  | 100 | 100 | 5.7  | 6.7  | 6.7  | 8.3  | 8.3  | 8.4  | 10.8 |
| L6G                      |       |       |     |      |      |      |      | 9.2 | 9.2 | 5.4  | 5.7  | 5.7  | 8.7  | 8.6  | 8.4  | 8.5  |
| W7G                      |       |       |     |      |      |      |      |     | 100 | 5.7  | 6.7  | 6.7  | 8.3  | 8.3  | 8.4  | 10.8 |
| W6G                      |       |       |     |      |      |      |      |     |     | 5.7  | 6.7  | 6.7  | 8.3  | 8.3  | 8.4  | 10.8 |
| SP7G                     |       |       |     |      |      |      |      |     |     |      | 5.3  | 5.3  | 7.6  | 7.6  | 7.4  | 5.3  |
| W10G                     |       |       |     |      |      |      |      |     |     |      |      | 99.5 | 8.9  | 8.8  | 8.9  | 9.8  |
| SA3G                     |       |       |     |      |      |      |      |     |     |      |      |      | 8.9  | 8.8  | 8.9  | 9.8  |
| SA5Y                     |       |       |     |      |      |      |      |     |     |      |      |      |      | 100  | 100  | 10.8 |
| SL4G                     |       |       |     |      |      |      |      |     |     |      |      |      |      |      | 100  | 10.8 |
| SL5Y                     |       |       |     |      |      |      |      |     |     |      |      |      |      |      |      | 10.9 |
| SO5Y                     |       |       |     |      |      |      |      |     |     |      |      |      |      |      |      |      |

| Large cluster – Immunity |       |       |      |      |      |      |      |     |     |      |      |      |      |      |      |      |
|--------------------------|-------|-------|------|------|------|------|------|-----|-----|------|------|------|------|------|------|------|
|                          | A1552 | SA10G | E7G  | SA7G | SL6Y | SP6G | L6G  | W7G | W6G | SP7G | W10G | SA3G | SA5Y | SL4G | SL5Y | SO5Y |
| A1552                    |       | 11.7  | 11.7 | 11.7 | 7.7  | 8.1  | 12.0 | 8.1 | 8.1 | 6.4  | 100  | 100  | 11.7 | 11.7 | 11.7 | 15.8 |
| SA10G                    |       |       | 100  | 100  | 10.8 | 6.8  | 8.4  | 6.8 | 6.8 | 10.9 | 11.7 | 11.7 | 100  | 100  | 100  | 10.5 |
| E7G                      |       |       |      | 100  | 10.8 | 6.8  | 8.4  | 6.8 | 6.8 | 10.9 | 11.7 | 11.7 | 100  | 100  | 100  | 10.5 |
| SA7G                     |       |       |      |      | 10.8 | 6.8  | 8.4  | 6.8 | 6.8 | 10.9 | 11.7 | 11.7 | 100  | 100  | 100  | 10.5 |
| SL6Y                     |       |       |      |      |      | 8.5  | 15.8 | 8.5 | 8.5 | 8.8  | 7.7  | 7.7  | 10.8 | 10.8 | 10.8 | 10.1 |
| SP6G                     |       |       |      |      |      |      | 7.0  | 100 | 100 | 8.4  | 8.1  | 8.1  | 6.8  | 6.8  | 6.8  | 9.7  |
| L6G                      |       |       |      |      |      |      |      | 7.0 | 7.0 | 8.5  | 12.0 | 12.0 | 8.4  | 8.4  | 8.4  | 11.2 |
| W7G                      |       |       |      |      |      |      |      |     | 100 | 8.4  | 8.1  | 8.1  | 6.8  | 6.8  | 6.8  | 9.7  |
| W6G                      |       |       |      |      |      |      |      |     |     | 8.4  | 8.1  | 8.1  | 6.8  | 6.8  | 6.8  | 9.7  |
| SP7G                     |       |       |      |      |      |      |      |     |     |      | 6.4  | 6.4  | 10.9 | 10.9 | 10.9 | 7.5  |
| W10G                     |       |       |      |      |      |      |      |     |     |      |      | 100  | 11.7 | 11.7 | 11.7 | 15.8 |
| SA3G                     |       |       |      |      |      |      |      |     |     |      |      |      | 11.7 | 11.7 | 11.7 | 15.8 |
| SA5Y                     |       |       |      |      |      |      |      |     |     |      |      |      |      | 100  | 100  | 10.5 |
| SL4G                     |       |       |      |      |      |      |      |     |     |      |      |      |      |      | 100  | 10.5 |
| SL5Y                     |       |       |      |      |      |      |      |     |     |      |      |      |      |      |      | 10.5 |
| SO5Y                     |       |       |      |      |      |      |      |     |     |      |      |      |      |      |      |      |

Green: 100% identity (same family and subfamily)  
 Yellow: 90% - 99.99% identity (same family, with some polymorphism)  
 Orange: 30% - 90% identity (same family, with considerable polymorphism)  
 Red: <30% identity (different families)

**Table S6.** Matrices of % identity (percentage of residues which are identical) among effector and immunity proteins harbored in the T6SS auxiliary cluster 1 from environmental *V. cholerae* strains and pandemic strain A1552.

| Auxiliary cluster 1 – Effector |       |       |      |      |      |      |      |      |      |      |      |      |      |      |       |      |
|--------------------------------|-------|-------|------|------|------|------|------|------|------|------|------|------|------|------|-------|------|
|                                | A1552 | SA10G | E7G  | SA7G | SL6Y | SP6G | L6G  | W7G  | W6G  | SP7G | W10G | SA3G | SA5Y | SL4G | SL5Y  | SO5Y |
| A1552                          |       | 15.0  | 15.0 | 15.0 | 15.5 | 15.0 | 15.5 | 15.8 | 15.8 | 15.8 | 14.6 | 15.9 | 15.9 | 15.9 | 14.9  | 15.3 |
| SA10G                          |       |       | 100  | 100  | 90.4 | 99.7 | 90.6 | 94.6 | 94.6 | 94.6 | 91.3 | 94.5 | 94.5 | 94.4 | 92.5  | 98.9 |
| E7G                            |       |       |      | 100  | 90.4 | 99.7 | 90.6 | 94.6 | 94.6 | 94.6 | 91.3 | 94.5 | 94.5 | 94.4 | 92.5  | 98.9 |
| SA7G                           |       |       |      |      | 90.4 | 99.7 | 90.6 | 94.6 | 94.6 | 94.6 | 91.3 | 94.5 | 94.5 | 94.4 | 92.5  | 98.9 |
| SL6Y                           |       |       |      |      |      | 90.4 | 99.9 | 92.9 | 92.9 | 92.9 | 87.0 | 92.8 | 92.8 | 92.7 | 94.5  | 91.1 |
| SP6G                           |       |       |      |      |      |      | 90.6 | 94.4 | 94.4 | 94.3 | 91.3 | 94.2 | 94.2 | 94.1 | 92.3  | 98.9 |
| L6G                            |       |       |      |      |      |      |      | 93.1 | 93.1 | 93.1 | 87.2 | 92.9 | 92.9 | 92.8 | 94.6  | 91.3 |
| W7G                            |       |       |      |      |      |      |      |      | 100  | 100  | 90.3 | 99.6 | 99.6 | 99.4 | 91.0  | 94.6 |
| W6G                            |       |       |      |      |      |      |      |      |      | 100  | 90.3 | 99.6 | 99.6 | 99.4 | 91.0  | 94.6 |
| SP7G                           |       |       |      |      |      |      |      |      |      |      | 90.3 | 99.6 | 99.6 | 99.4 | 91.0  | 94.6 |
| W10G                           |       |       |      |      |      |      |      |      |      |      |      | 90.1 | 90.1 | 89.9 | 89.9  | 91.9 |
| SA3G                           |       |       |      |      |      |      |      |      |      |      |      |      | 100  | 99.9 | 90.8  | 94.5 |
| SA5Y                           |       |       |      |      |      |      |      |      |      |      |      |      |      | 99.9 | 90.83 | 94.5 |
| SL4G                           |       |       |      |      |      |      |      |      |      |      |      |      |      |      | 90.7  | 94.4 |
| SL5Y                           |       |       |      |      |      |      |      |      |      |      |      |      |      |      |       | 92.7 |
| SO5Y                           |       |       |      |      |      |      |      |      |      |      |      |      |      |      |       |      |

| Auxiliary cluster 1 – Immunity |       |       |      |      |      |      |      |      |      |      |      |      |      |      |      |      |
|--------------------------------|-------|-------|------|------|------|------|------|------|------|------|------|------|------|------|------|------|
|                                | A1552 | SA10G | E7G  | SA7G | SL6Y | SP6G | L6G  | W7G  | W6G  | SP7G | W10G | SA3G | SA5Y | SL4G | SL5Y | SO5Y |
| A1552                          |       | 15.5  | 15.5 | 15.5 | 15.2 | 15.5 | 15.2 | 15.9 | 15.9 | 15.9 | 14.0 | 15.9 | 15.9 | 15.9 | 15.1 | 15.1 |
| SA10G                          |       |       | 100  | 100  | 72.1 | 99.6 | 71.7 | 85.7 | 85.7 | 85.7 | 78.3 | 85.7 | 85.7 | 85.7 | 76.2 | 97.5 |
| E7G                            |       |       |      | 100  | 72.1 | 99.6 | 71.7 | 85.7 | 85.7 | 85.7 | 78.3 | 85.7 | 85.7 | 85.7 | 76.2 | 97.5 |
| SA7G                           |       |       |      |      | 72.1 | 99.6 | 71.7 | 85.7 | 85.7 | 85.7 | 78.3 | 85.7 | 85.7 | 85.7 | 76.2 | 97.5 |
| SL6Y                           |       |       |      |      |      | 72.1 | 99.6 | 78.7 | 78.7 | 78.7 | 65.6 | 78.7 | 78.7 | 78.7 | 91.4 | 72.5 |
| SP6G                           |       |       |      |      |      |      | 71.7 | 85.7 | 85.7 | 85.7 | 77.9 | 85.7 | 85.7 | 85.7 | 75.8 | 97.1 |
| L6G                            |       |       |      |      |      |      |      | 78.3 | 78.3 | 78.3 | 65.2 | 78.3 | 78.3 | 78.3 | 90.9 | 72.1 |
| W7G                            |       |       |      |      |      |      |      |      | 100  | 100  | 71.3 | 100  | 100  | 100  | 73.0 | 85.2 |
| W6G                            |       |       |      |      |      |      |      |      |      | 100  | 71.3 | 100  | 100  | 100  | 73.0 | 85.2 |
| SP7G                           |       |       |      |      |      |      |      |      |      |      | 71.3 | 100  | 100  | 100  | 73.0 | 85.2 |
| W10G                           |       |       |      |      |      |      |      |      |      |      |      | 71.3 | 71.3 | 71.3 | 70.2 | 79.2 |
| SA3G                           |       |       |      |      |      |      |      |      |      |      |      |      | 100  | 100  | 73.0 | 85.2 |
| SA5Y                           |       |       |      |      |      |      |      |      |      |      |      |      |      | 100  | 73.0 | 85.2 |
| SL4G                           |       |       |      |      |      |      |      |      |      |      |      |      |      |      | 73.0 | 85.2 |
| SL5Y                           |       |       |      |      |      |      |      |      |      |      |      |      |      |      |      | 76.3 |
| SO5Y                           |       |       |      |      |      |      |      |      |      |      |      |      |      |      |      |      |

Green: 100% identity (same family and subfamily)  
 Yellow: 90% - 99.99% identity (same family, with some polymorphism)  
 Orange: 30% - 90% identity (same family, with considerable polymorphism)  
 Red: <30% identity (different families)

**Table S7.** Matrices of % identity (percentage of residues which are identical) among effector and immunity proteins harbored in the T6SS auxiliary cluster 2 from environmental *V. cholerae* strains and pandemic strain A1552.

| Auxiliary cluster 2 – Effector |       |       |      |      |      |      |      |      |      |      |      |      |      |      |      |      |
|--------------------------------|-------|-------|------|------|------|------|------|------|------|------|------|------|------|------|------|------|
|                                | A1552 | SA10G | E7G  | SA7G | SL6Y | SP6G | L6G  | W7G  | W6G  | SP7G | W10G | SA3G | SA5Y | SL4G | SL5Y | SO5Y |
| A1552                          |       | 14.6  | 14.4 | 14.4 | 98.3 | 94.8 | 14.8 | 94.0 | 94.0 | 14.8 | 96.5 | 94.3 | 93.6 | 93.6 | 93.6 | 12.7 |
| SA10G                          |       |       | 95.2 | 95.2 | 14.5 | 15.3 | 97.6 | 15.2 | 15.2 | 97.5 | 14.9 | 15.0 | 15.2 | 15.2 | 15.2 | 20.2 |
| E7G                            |       |       |      | 100  | 14.3 | 15.0 | 95.1 | 15.0 | 15.0 | 95.0 | 14.6 | 14.7 | 15.1 | 15.1 | 15.1 | 19.8 |
| SA7G                           |       |       |      |      | 14.3 | 15.0 | 95.1 | 15.0 | 15.0 | 95.0 | 14.6 | 14.7 | 15.1 | 15.1 | 15.1 | 19.8 |
| SL6Y                           |       |       |      |      |      | 94.1 | 14.7 | 93.7 | 93.5 | 14.7 | 95.7 | 93.8 | 93.7 | 93.7 | 93.7 | 12.8 |
| SP6G                           |       |       |      |      |      |      | 15.4 | 96.1 | 96.1 | 15.4 | 94.7 | 98.8 | 95.0 | 95.0 | 95.0 | 12.7 |
| L6G                            |       |       |      |      |      |      |      | 15.3 | 15.3 | 99.9 | 15.0 | 15.2 | 15.4 | 15.4 | 15.4 | 19.8 |
| W7G                            |       |       |      |      |      |      |      |      | 100  | 15.3 | 93.8 | 94.8 | 99.0 | 99.0 | 99.0 | 13.0 |
| W6G                            |       |       |      |      |      |      |      |      |      | 15.3 | 93.8 | 94.8 | 99.0 | 99.0 | 99.0 | 13.0 |
| SP7G                           |       |       |      |      |      |      |      |      |      |      | 15.0 | 15.2 | 15.4 | 15.4 | 15.4 | 19.8 |
| W10G                           |       |       |      |      |      |      |      |      |      |      |      | 94.0 | 93.4 | 93.4 | 93.4 | 12.8 |
| SA3G                           |       |       |      |      |      |      |      |      |      |      |      |      | 94.0 | 94.0 | 94.0 | 12.4 |
| SA5Y                           |       |       |      |      |      |      |      |      |      |      |      |      |      | 100  | 100  | 13.0 |
| SL4G                           |       |       |      |      |      |      |      |      |      |      |      |      |      |      | 100  | 13.0 |
| SL5Y                           |       |       |      |      |      |      |      |      |      |      |      |      |      |      |      | 13.0 |
| SO5Y                           |       |       |      |      |      |      |      |      |      |      |      |      |      |      |      |      |

| Auxiliary cluster 2 – Immunity |       |       |      |      |      |      |      |      |      |      |      |      |      |      |      |      |
|--------------------------------|-------|-------|------|------|------|------|------|------|------|------|------|------|------|------|------|------|
|                                | A1552 | SA10G | E7G  | SA7G | SL6Y | SP6G | L6G  | W7G  | W6G  | SP7G | W10G | SA3G | SA5Y | SL4G | SL5Y | SO5Y |
| A1552                          |       | 13.2  | 12.9 | 12.9 | 99.6 | 72.3 | 12.9 | 68.7 | 68.7 | 12.9 | 83.9 | 71.9 | 68.3 | 68.3 | 68.2 | 12.4 |
| SA10G                          |       |       | 73.1 | 73.1 | 13.2 | 13.6 | 92.5 | 12.9 | 12.9 | 92.2 | 12.5 | 13.6 | 12.9 | 12.9 | 12.9 | 9.4  |
| E7G                            |       |       |      | 100  | 12.9 | 11.2 | 73.9 | 11.9 | 11.9 | 73.9 | 12.2 | 11.5 | 11.9 | 11.9 | 11.9 | 8.1  |
| SA7G                           |       |       |      |      | 12.9 | 11.2 | 73.9 | 11.9 | 11.9 | 73.9 | 12.2 | 11.5 | 11.9 | 11.9 | 11.9 | 8.1  |
| SL6Y                           |       |       |      |      |      | 71.9 | 12.9 | 68.3 | 68.3 | 12.9 | 83.5 | 71.5 | 67.9 | 67.9 | 67.9 | 12.4 |
| SP6G                           |       |       |      |      |      |      | 12.5 | 80.1 | 80.1 | 12.5 | 74.0 | 99.6 | 80.5 | 80.5 | 80.5 | 12.1 |
| L6G                            |       |       |      |      |      |      |      | 12.5 | 12.5 | 99.7 | 12.2 | 12.5 | 12.5 | 12.5 | 12.5 | 9.9  |
| W7G                            |       |       |      |      |      |      |      |      | 100  | 12.5 | 67.5 | 79.7 | 99.2 | 99.2 | 99.2 | 11.0 |
| W6G                            |       |       |      |      |      |      |      |      |      | 12.5 | 67.5 | 79.7 | 99.2 | 99.2 | 99.2 | 11.0 |
| SP7G                           |       |       |      |      |      |      |      |      |      |      | 12.2 | 12.5 | 12.5 | 12.5 | 12.5 | 9.9  |
| W10G                           |       |       |      |      |      |      |      |      |      |      |      | 73.6 | 67.5 | 67.5 | 67.5 | 11.2 |
| SA3G                           |       |       |      |      |      |      |      |      |      |      |      |      | 80.1 | 80.1 | 80.1 | 12.1 |
| SA5Y                           |       |       |      |      |      |      |      |      |      |      |      |      |      | 100  | 100  | 11.0 |
| SL4G                           |       |       |      |      |      |      |      |      |      |      |      |      |      |      | 100  | 11.0 |
| SL5Y                           |       |       |      |      |      |      |      |      |      |      |      |      |      |      |      | 11.0 |
| SO5Y                           |       |       |      |      |      |      |      |      |      |      |      |      |      |      |      |      |

Green: 100% identity (same family and subfamily)  
 Yellow: 90% - 99.99% identity (same family, with some polymorphism)  
 Orange: 30% - 90% identity (same family, with considerable polymorphism)  
 Red: <30% identity (different families)

## Supporting References

- Aldova, E., Laznickova, K., Stepankova, E., and Lietava, J. (1968) Isolation of nonagglutinable vibrios from an enteritis outbreak in Czechoslovakia. *J Infect Dis* **118**: 25–31.
- Benghezal, M., Fauvarque, M.O., Tournebize, R., Froquet, R., Marchetti, A., Bergeret, E., *et al.* (2006) Specific host genes required for the killing of *Klebsiella* bacteria by phagocytes. *Cell Microbiol* **8**: 139–148.
- Heidelberg, J.F., Elsen, J.A., Nelson, W.C., Clayton, R.A., Gwinn, M.L., Dodson, R.J., *et al.* (2000) DNA sequence of both chromosomes of the cholera pathogen *Vibrio cholerae*. *Nature* **406**: 477–483.
- Hersch, S.J., Watanabe, N., Stietz, M.S., Manera, K., Kamal, F., Burkinshaw, B., *et al.* (2020) Envelope stress responses defend against type six secretion system attacks independently of immunity proteins. *Nat Microbiol* **5**: 706–714.
- Keymer, D.P., Miller, M.C., Schoolnik, G.K., and Boehm, A.B. (2007) Genomic and phenotypic diversity of coastal *Vibrio cholerae* strains is linked to environmental factors. *Appl Environ Microbiol* **73**: 3705–3714.
- Kirchberger, P.C., Unterweger, D., Provenzano, D., Pukatzki, S., and Boucher, Y. (2017) Sequential displacement of type VI secretion system effector genes leads to evolution of diverse immunity gene arrays in *Vibrio cholerae*. *Sci Rep* **7**: 45133.
- Matthey, N., Drebes Dörr, N.C., and Blokesch, M. (2018) Long-read-based genome sequences of pandemic and environmental *Vibrio cholerae* strains. *Microbiol Resour Announc* **7**: e01574-18.
- Miyata, S.T., Kitaoka, M., Brooks, T.M., McAuley, S.B., and Pukatzki, S. (2011) *Vibrio cholerae* requires the type VI secretion system virulence factor *vasX* to kill *Dictyostelium discoideum*. *Infect Immun* **79**: 2941–2949.
- Unterweger, D., Miyata, S.T., Bachmann, V., Brooks, T.M., Mullins, T., Kostiuk, B., *et al.* (2014) The *Vibrio cholerae* type VI secretion system employs diverse effector modules for intraspecific competition. *Nat Commun* **5**: 3549.
- Van der Henst, C., Vanhove, A.S., Drebes Dörr, N.C., Stutzmann, S., Stoudmann, C., Clerc, S., *et al.* (2018) Molecular insights into *Vibrio cholerae*'s intra-amoebal host-pathogen interactions. *Nat Commun* **9**: 3420.
- Yildiz, F.H. and Schoolnik, G.K. (1998) Role of *rpoS* in stress survival and virulence of *Vibrio cholerae*. *J Bacteriol* **180**: 773–784.
